# Supplementary material for: CD28-CAR-T cell activation through FYN kinase signaling rather than LCK enhances therapeutic performance
Source: PubMed Central journal article supplement — Cell Rep Med. 2023 Jan 24;4(2):100917. doi: 10.1016/j.xcrm.2023.100917 (PMC9975250; doi:10.1016/j.xcrm.2023.100917), 2023-01-24
Supplement: mmc1.pdf [file mmc1.pdf]

**Cell Reports Medicine, Volume 4**

**Supplemental information**

**CD28-CAR-T cell activation through FYN**

**kinase signaling rather than LCK**

**enhances therapeutic performance**

**Ling Wu, Joanna Brzostek, Previtha Dawn Sakthi Vale, Qianru Wei, Clara K.T. Koh, June Xu Hui Ong, Liang-zhe Wu, Jia Chi Tan, Yen Leong Chua, Jiawei Yap, Yuan Song, Vivian Jia Yi Tan, Triscilla Y.Y. Tan, Junyun Lai, Paul A. MacAry, and Nicholas R.J. Gascoigne**

1 **Table**

2 **CRISPR-Cas9 guide RNA (gRNA) sequences for LCK and FYN knock out. Related to STAR method.**

3

| <b>gRNA</b> | <b>Sequence</b>      |
|-------------|----------------------|
| LCK gRNA1   | GACCCACTGGTTACCTACGA |
| LCK gRNA2   | GCCGGGAAAAGTGATTCGAG |
| FYN gRNA1   | AGAGTTCACACCTCCAAAGA |
| FYN gRNA2   | ACGGGGACCTTGCGTACGAG |
| FYN gRNA3   | TTGTCCTTTGGAAACCCAAG |
| FYN gRNA4   | GTCCCCCGAATCATTCTTG  |
| FYN gRNA5   | TGGATACTACATTACCACCC |

4

5 gRNA pool for LCK and FYN knock out. Each of gRNA was selected from <http://chopchop.cbu.uib.no/>. After

6 screening, LCK gRNA2 and FYN gRNA3 were chosen for LCK and FYN knock out respectively.

7

8

9 **Figures**

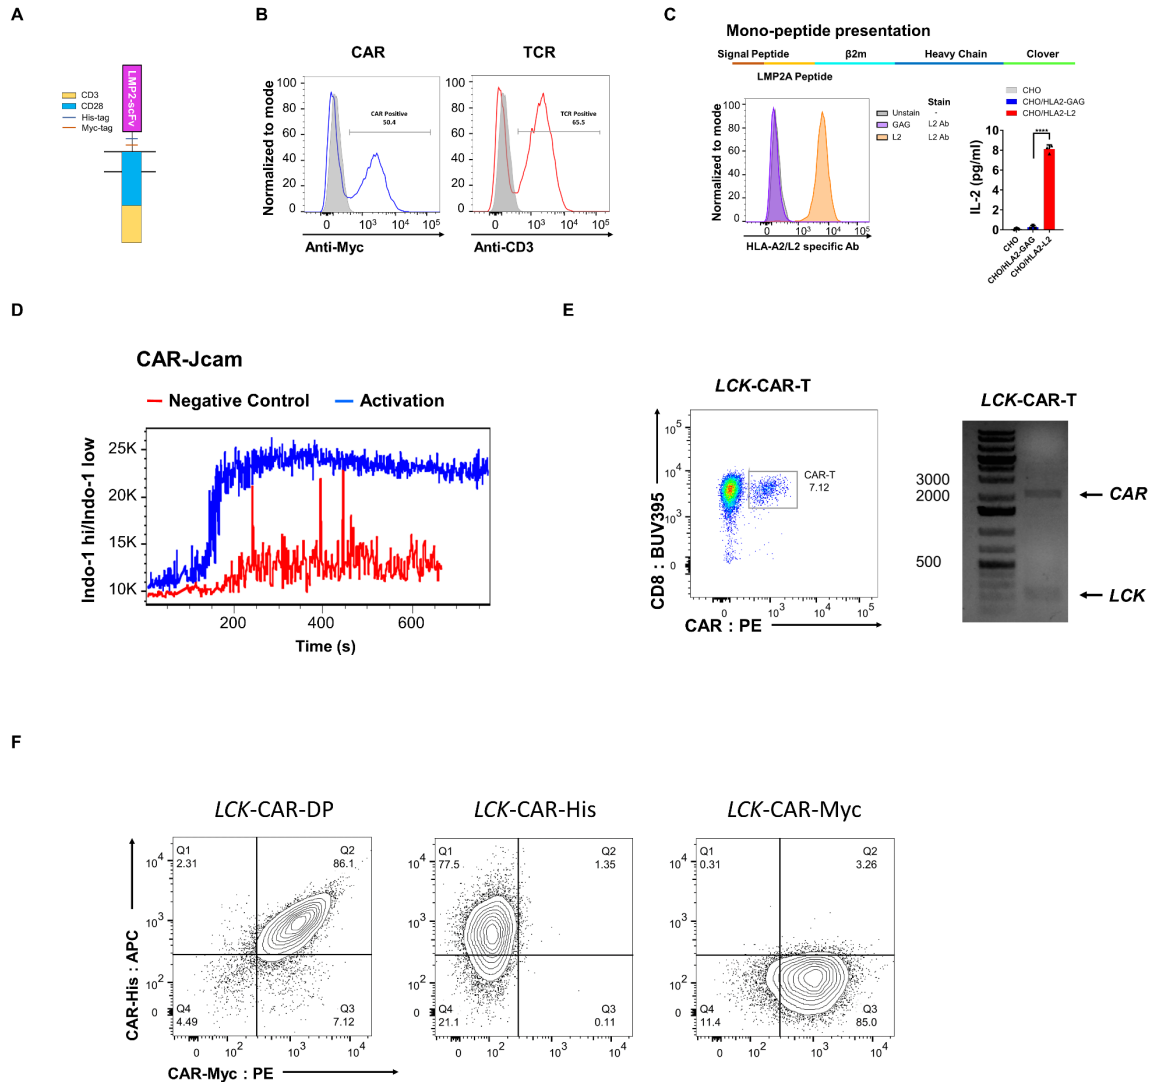

10

11 **Figure S1. CAR signaling does not require LCK. Related to Figure 1.** (A) Schematic diagram of CAR  
 12 construct. Myc-tag was used for the detection of CAR expression. (B) Expression of LMP2A peptide (L2)-specific  
 13 CAR or TCR after lentiviral transduction of Jurkat76. CAR was stained using anti-Myc, TCR with anti-CD3 Abs.  
 14 (C) Schematic diagram of the scHLA construct with linked peptide (“mono-peptide system”: upper). Lower left:  
 15 staining with L2-specific TCR-like Ab on CHO-L2 or CHO-GAG. Lower right: responsiveness of L2-specific  
 16 CAR-T to CHO-L2 versus CHO-GAG. Mean  $\pm$ SD of technical triplicates, from 3 experiments. (D)  $Ca^{2+}$  flux of  
 17 CAR-Jcam cells. Negative control was PBS, activation by adding specific pMHC tetramer. (E) *LCK* locus-

18 targeted CRISPR-Cas9 editing. Left panel shows the percentage of CD8<sup>+</sup> CAR<sup>+</sup> CAR-T cells after editing. Right  
19 panel is the genotyping of the targeted site in the *LCK* gene. Forward primer: 5'-  
20 AGGGAGAGGTGGTGAACATTA-3', reverse primer: 5'- GAATGGAGTAGGGCATTGAAAG-3'. (F)  
21 CAR-His and CAR-Myc expression after HDR and cell sort.

22

23

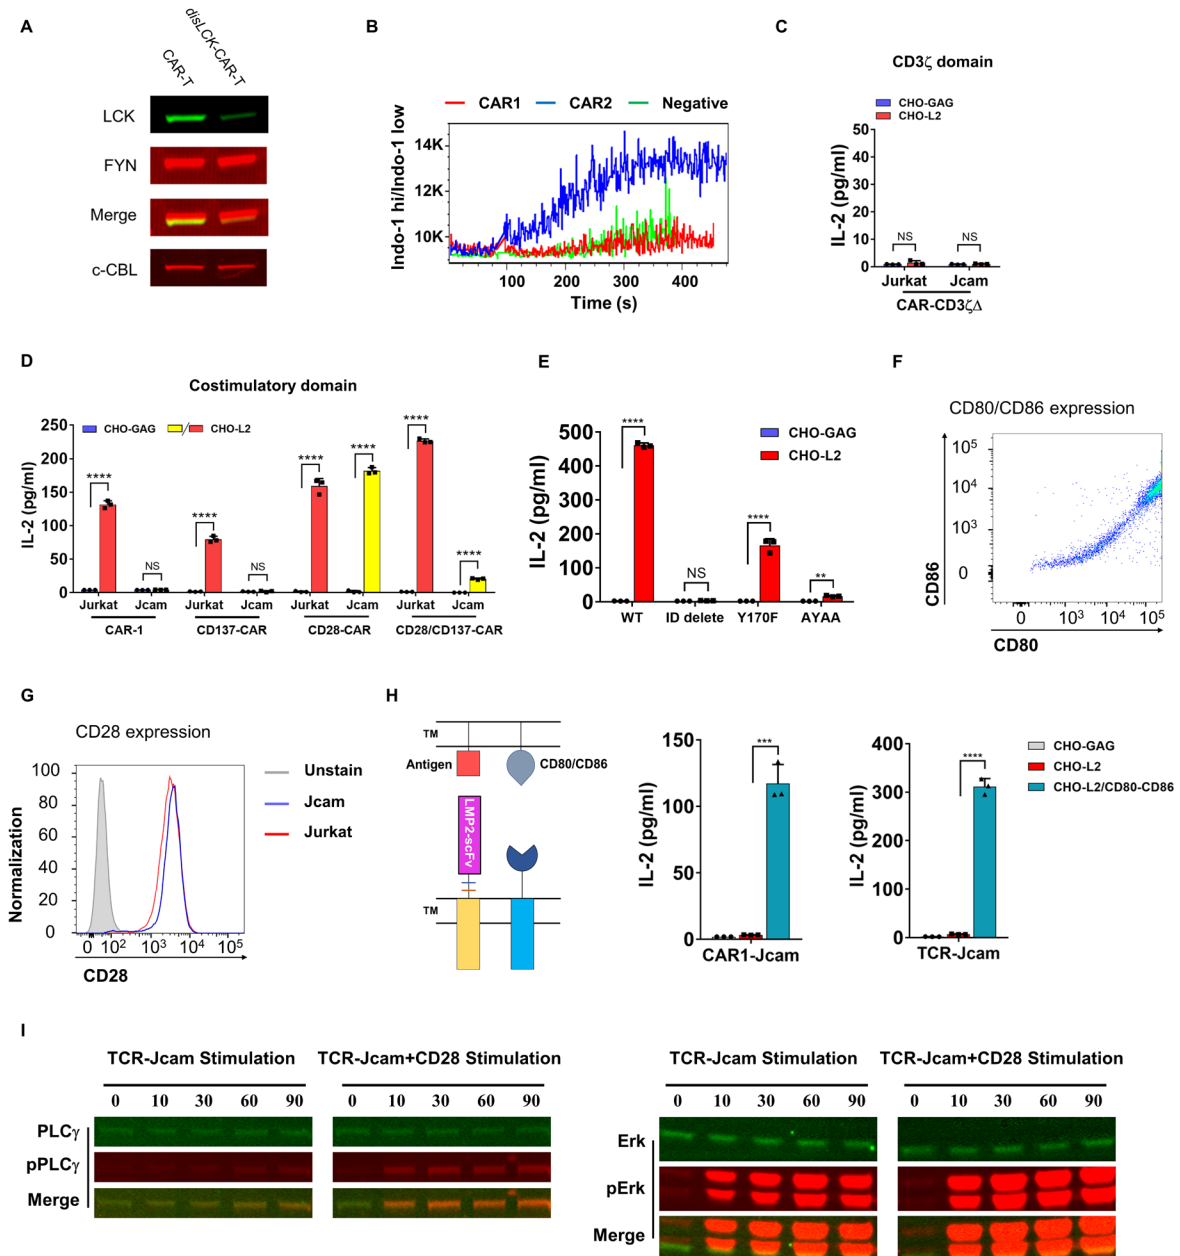

24

25 **Figure S2. LCK-independent CAR signaling requires CD28 as costimulatory domain. Related to Figure 2.**

26 (A) LCK protein expression of sorted *disLCK*-CAR-T cells in comparison with conventional CAR-T. (B) Calcium

27 flux of CAR2-Jcam or CAR1-Jcam after specific HLA-A2-L2 tetramer was added into the medium. The second

28 generation CAR with CD28 costimulatory domain in Jcam1.6 cell is labeled as CAR2-Jcam, and the first

29 generation of CAR in Jcam1.6 cell is labeled as CAR1-Jcam. (C) IL-2 production of CAR constructs without

30 CD3 $\zeta$  signaling domain in Jurkat or Jcam cells. (D) IL-2 production of CAR constructs with different intracellular

31 domains in Jurkat or Jcam cells. (E) IL-2 production of Jcam cells expressing different CD28-CAR mutants. (F)

32 Co-expression of CD80 and CD86 on CHO-L2 APC. The CD80 and CD86 were linked by P2A cleavable linker.  
33 CD80-P2A-CD86 construct was on one lentivirus vector. **(G)** Endogenous CD28 expression on Jurkat or Jcam1.6  
34 cell lines. **(H)** Schematic of CD28 costimulation of CAR1 on JCam1.6 T cells and their responsiveness in Jcam1.6  
35 to CHO-L2 expressing co-stimulators CD80 and CD86. **(I)** Phosphorylation of TCR signaling pathway with or  
36 without endogenous CD28 costimulation.

37

38

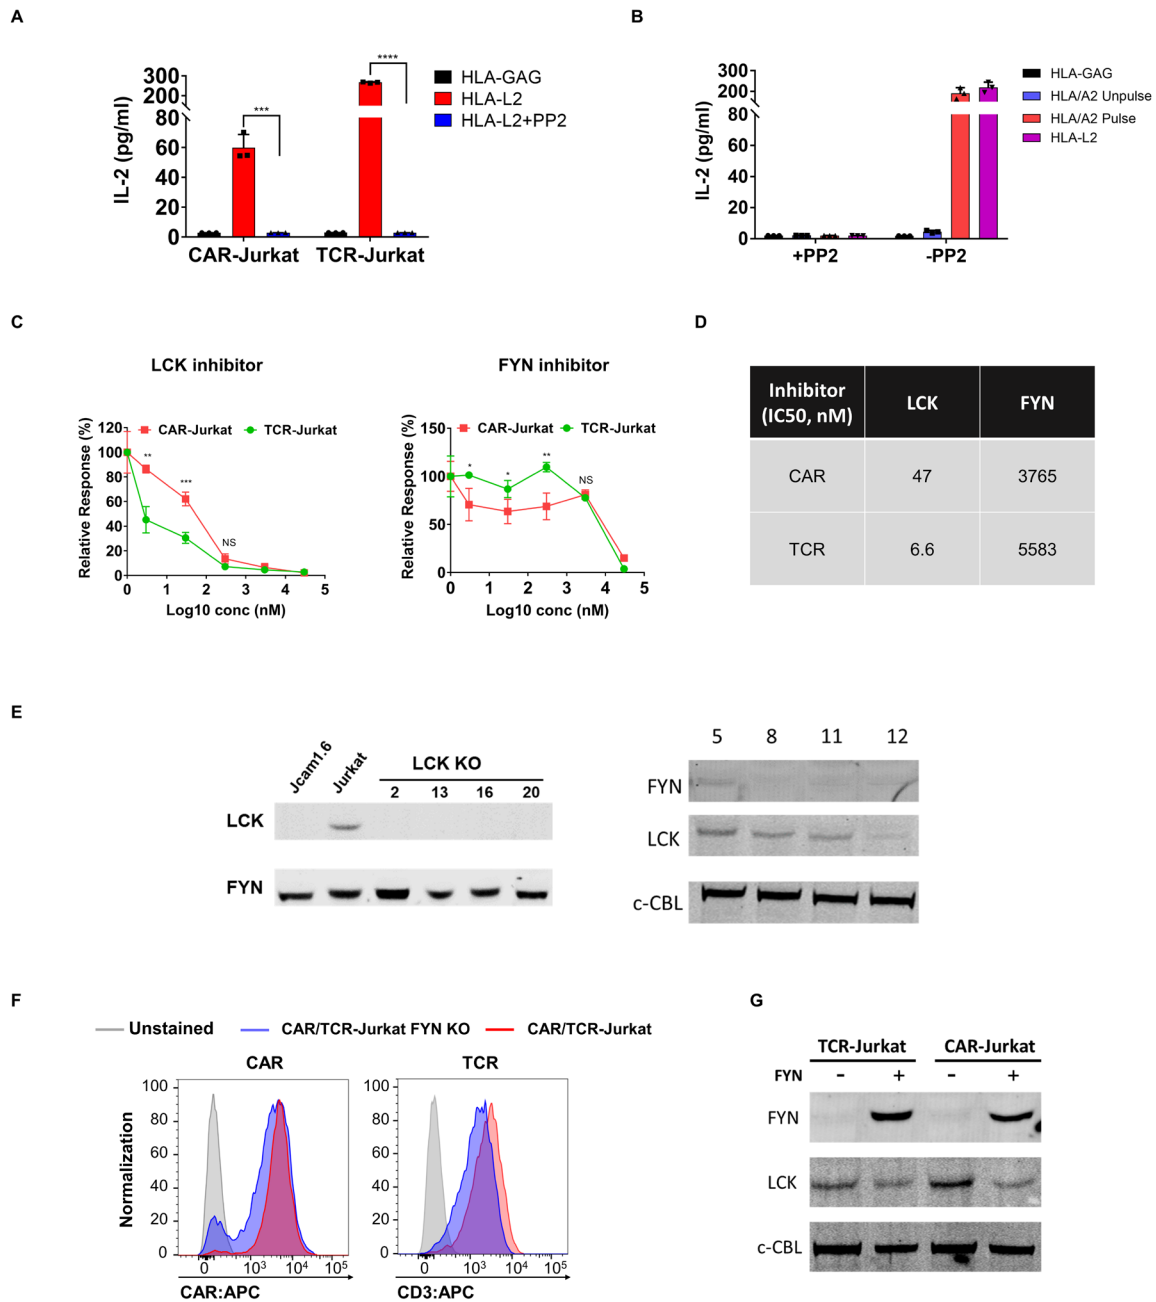

39

40 **Figure S3. CD28-CAR relies on FYN to transduce downstream signaling. Related to Figure 3. (A)**

41 Responsiveness of CAR and TCR-Jurkat with SFK inhibitor PP2 (10 $\mu$ M). **(B)** IL-2 production of CAR-Jcam cell

42 with or without SFK PP2. **(C)** Responsiveness of CAR and TCR-Jurkat in the presence of LCK or FYN inhibitors

43 A770041 or SU6656, respectively. IL-2 production was normalized to that without inhibitors as the relative

44 response (%) against log (inhibitor concentration). **(D)** IC50 of LCK- or FYN-specific inhibitors on CAR-Jurkat

45 or TCR Jurkat cell. **(E)** LCK KO and FYN KO single clone selection. Clone 20 in LCK KO was selected as Jurkat

46 LCK KO cell, and Clone 8 in FYN KO was selected as Jurkat FYN KO cell. **(F)** The CAR or TCR expression

47 detection on CAR-Jurkat FYN KO and CAR-Jurkat or on TCR-Jurkat FYN KO and TCR-Jurkat. CD3 was used  
48 as an indicator of TCR expression. (G) FYN and LCK expression in CAR-Jurkat FYN KO and CAR-Jurkat or on  
49 TCR-Jurkat FYN KO and TCR-Jurkat.

50



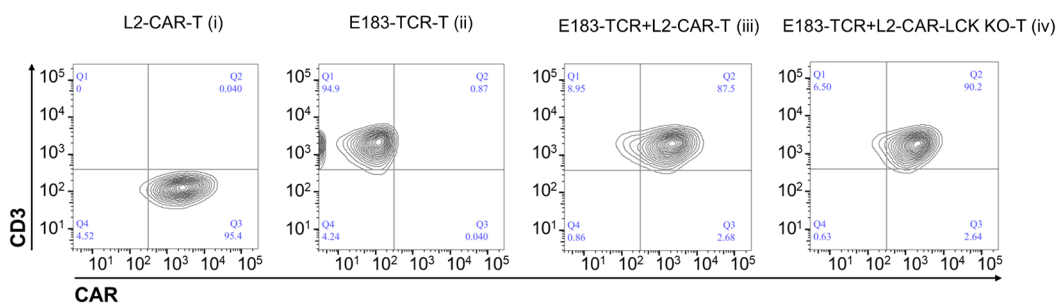

51

52 **Figure S4. CAR or TCR expression on LCK-sufficient or deficient Jurkat after transduction and cell sort.**

53 **Related to Figure 4.** The TCR is specific for a peptide epitope from HBV antigen, E183. CAR was with the

54 specificity as above, the peptide epitope (L2) from LMP2A protein.

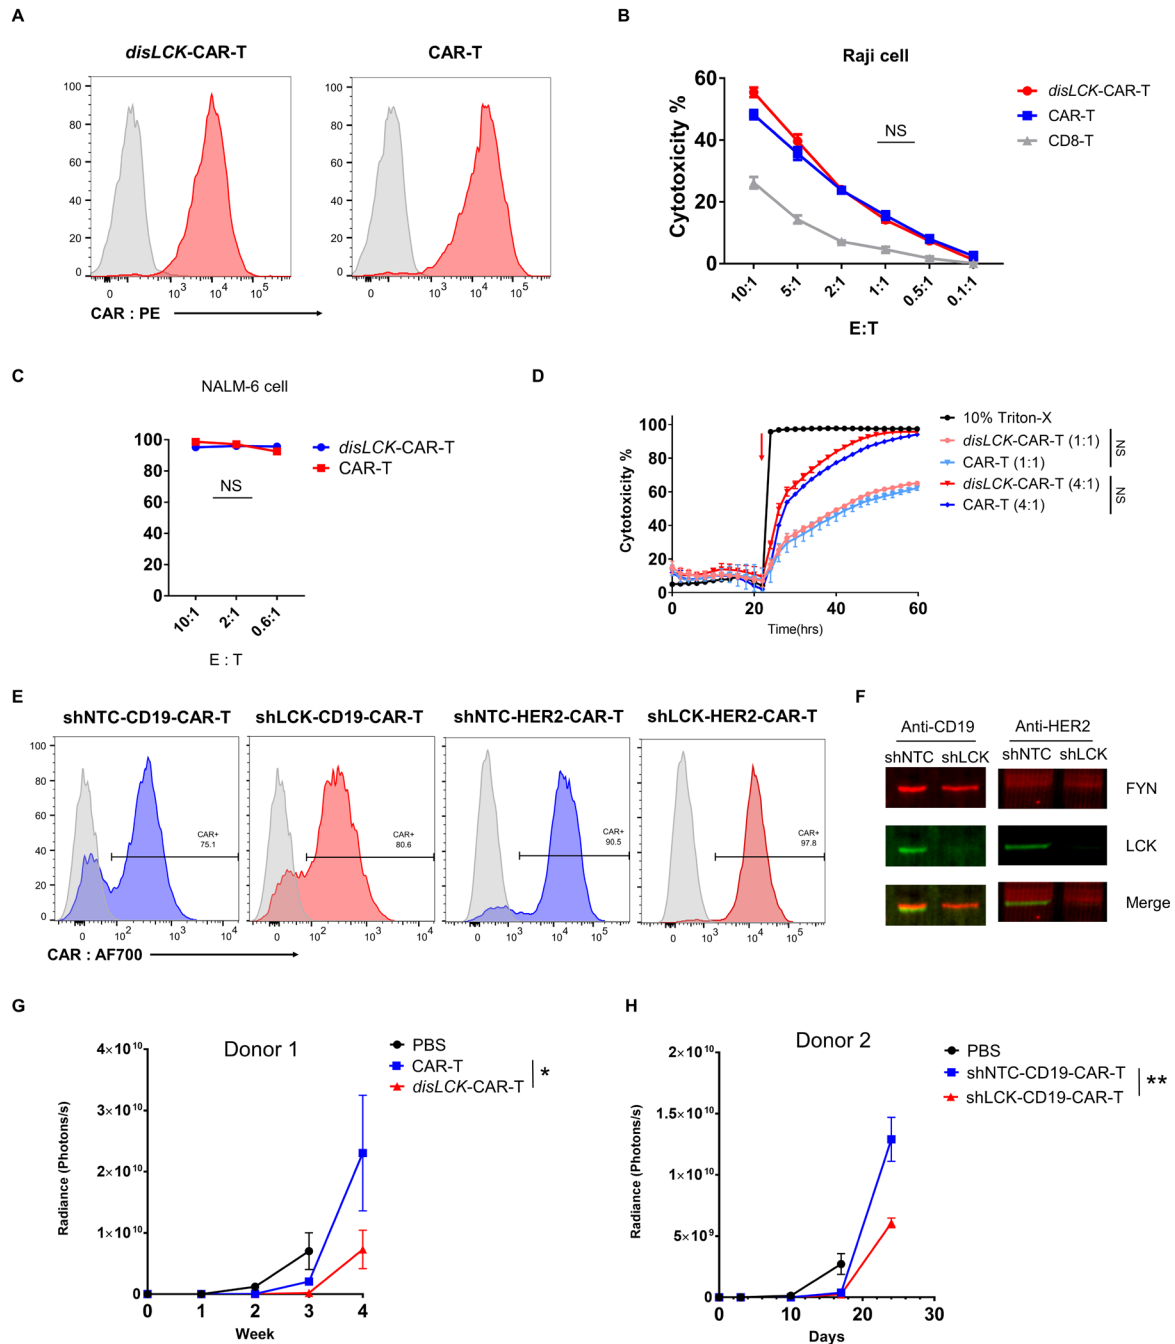

55

56 **Figure S5. *In vitro* and *in vivo* performance of *disLCK-CAR-T* cells. Related to Figure 5. (A)** CAR expression  
 57 of *disLCK-CAR-T* and conventional CAR-T after sorting and restimulation by feeder cells. Cytotoxicity of  
 58 conventional CAR-T and *disLCK-CAR-T* to Daudi cells (B) and Nalm-6 cells (C). (D) Real time killing by two  
 59 conventional CAR-T and *disLCK-CAR-T* cells to CD19-expressing CHO cells. The cytotoxicity was calculated  
 60 by the formula: 1-cell index(sample)/cell index(media). (E) CAR expression of shRNA-CAR-T cells after sorting  
 61 and restimulation by feeder cells. (F) LCK protein expression of sorted shRNA-CAR-T cells. (G, H) *In vivo*

62 luciferase signal from Nalm-6 cells at different time points. 2-way ANOVA was used to test the statistical  
63 significance.

64

65



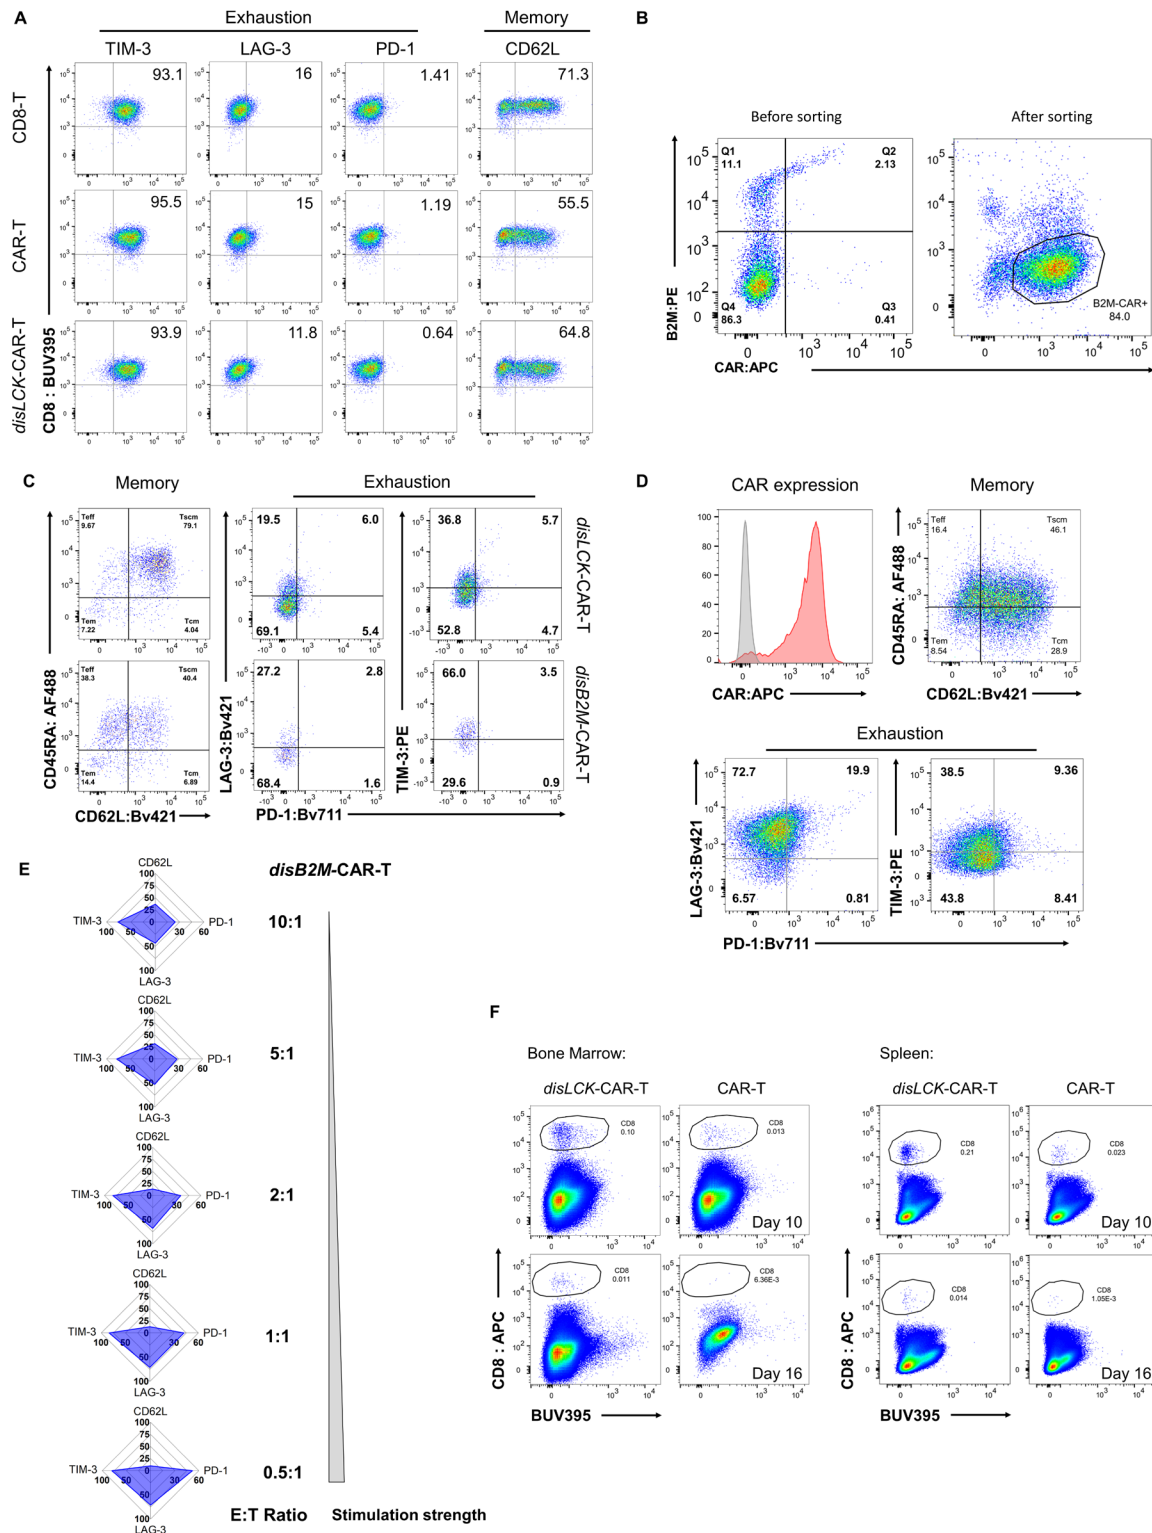

72

73 **Figure S7. Independence from LCK makes CAR-T cells more specific, memory-like and less exhausted.**

74 **Related to Figure 6 and Figure 7. (A)** The memory and exhaustion state of *disLCK-CAR-T* and conventional

75 CAR-T in quiescent state. The data is from another donors' T cells. **(B)** CAR and B2M expression after *B2M*

76 locus-targeted HDR. *disB2M-CAR-T* cells were generated by using gRNA, GGCCGAGAUGUCUCGCUCCG,

77 through the same process as *disLCK*-CAR-T cells. **(C)** Comparison of the immunotyping of the *disB2M*-CAR-T  
78 and *disLCK*-CAR-T cells at resting state. The cells were gated before cell sort. **(D)** *disB2M*-CAR-T cells  
79 immunophenotype at day 5 after CAR-T cells sorting and restimulation by feeder cells. **(E)** Radar chart summary  
80 of exhaustion and memory marker expression in *disB2M*-CAR-T cells after encountering target cells at different  
81 E:T ratios. **(F)** Representative FACS graphs of CAR-T cells in bone marrow and spleen at day 10 and day 16.
